# Supplementary material
Source: Elsevier journal article supplement (https://www.sciencedirect.com/science/article/pii/S0009739X22000483)
Supplement: mmc1 [file S0009739X22000483:mmc1.pdf]

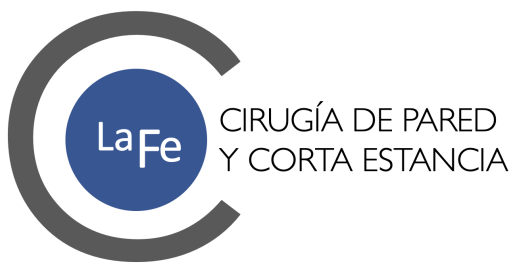

## Estado actual del cierre de pared en cirugía colorrectal. ¿Dónde estamos en el 2021?

Recuerda que nos interesa más lo que se hace habitualmente en vuestra Unidad/Servicio/Hospital.

¿Cuál creéis que es el mejor tipo de sutura para una laparotomía media?

- ☐ Sutura continua
- ☐ Sutura con puntos sueltos
- ☐ Sutura continua más puntos sueltos
- ☐ Otras

¿Cuál creéis que es la mejor técnica de sutura en una laparotomía media?

- ☐ Sutura por planos
- ☐ Sutura en un solo plano
- ☐ Otra

¿Creéis que los puntos en masa («puntos totales») tienen utilidad en el cierre de una laparotomía?

- ☐ Sí
- ☐ No
- ☐ Sólo en el contexto de la urgencia
- ☐ No lo sé

¿Cuál creéis que es la mejor técnica de sutura en una laparotomía transversa?

- ☐ Sutura por planos
- ☐ Sutura en un solo plano
- ☐ Otra

¿Cuál consideráis que es la mejor sutura para el cierre de una laparotomía?

- ☐ Sutura absorbible de absorción lenta.
- ☐ Sutura absorbible absorción muy lenta
- ☐ Sutura no absorbible
- ☐ Otra

¿Utilizáis suturas impregnadas de antibiótico (tipo Triclosán)?

- ☐ Sí
- ☐ No
- ☐ En campos contaminados

Calibre de sutura utilizado habitualmente para cierre pared:

- ☐ 2
- ☐ 1
- ☐ 0
- ☐ 2/0

¿Utilizáis suturas tipo loop habitualmente para cierre pared?

- ☐ Si
- ☐ No

¿Qué tamaño de aguja utilizáis habitualmente en el cierre de pared?

- ☐ 26
- ☐ 30
- ☐ 37
- ☐ 48
- ☐ No lo sé

¿Y qué tipo de aguja?

- ☐ Aguja de cuerpo cilíndrico y punta roma
- ☐ Aguja de cuerpo cilíndrico y punta trocar
- ☐ Aguja triangular
- ☐ Otra
- ☐ No lo sé

En procedimientos laparoscópicos, si se ha usado un trocar  $\geq 10$  mm, ¿cerráis el defecto aponeurótico?

- ☐ Sí
- ☐ No
- ☐ Solo si presenta factores de riesgo de eventración asociados

¿En la cirugía laparoscópica que incisiones de asistencia utilizáis con mas frecuencia?

- ☐ Laparotomía media
- ☐ Laparotomía lateral paramediana
- ☐ Laparotomía transversa
- ☐ Pfannenstiel
- ☐ La incisión de asistencia depende del segmento que se va a resecar

¿Conocéis la regla de la sutura del 4:1 para el cierre de una laparotomía media?

- ☐ Sí
- ☐ No

¿Creéis que se debe aplicar, como mínimo, la regla del 4:1 en el cierre de una laparotomía media?

- ☐ Sí
- ☐ No
- ☐ Sólo en el contexto de la urgencia
- ☐ Si, pero no en contexto de la urgencia
- ☐ No lo sé

¿Cómo creéis que deben ser las puntadas en el cierre de la laparotomía media?

- ☐ A 1 cm o más del borde; separadas 1 o más cm
- ☐ A 1 cm o más del borde, pero más juntas (< 1 cm)
- ☐ Separadas 1 o más cm, pero cogiendo menos de 1 cm de borde
- ☐ Pequeñas (< 1cm del borde) y juntas (< 1cm entre puntadas)
- ☐ No lo sé. Depende de cada paciente

¿Creéis que añadir una prótesis al cerrar una laparotomía puede disminuir la aparición de una eventración?

- ☐ Sí
- ☐ No
- ☐ Sólo en el contexto de la urgencia
- ☐ No lo sé

¿Utilizáis malla profláctica en el cierre laparotómico?

- ☐ Nunca
- ☐ En cirugía electiva, en pacientes de riesgo elevado
- ☐ Solo en la laparotomía de urgencias
- ☐ En cirugía electiva de pacientes de riesgo y en urgencias

¿Utilizáis malla profiláctica tras el cierre de un estoma temporal?

- ☐ Nunca
- ☐ Solo en pacientes de riesgo elevado
- ☐ Siempre

¿Colocáis malla profiláctica en la confección de un estoma definitivo?

- ☐ Nunca
- ☐ Solo en pacientes de riesgo elevado
- ☐ Siempre

¿Qué método utilizáis para prevenir la hernia incisional/evisceración en pacientes de riesgo elevado?

- ☐ Malla
- ☐ Puntos totales
- ☐ Sistemas de retención (Ventrofil® o similar)
- ☐ Ninguno, con una buena técnica de cierre es suficiente

¿Qué técnica utilizáis para la reparación de la evisceración postoperatoria?

- ☐ Sutura continua
- ☐ Sutura continua + puntos totales
- ☐ Sutura continua+ sistemas de retención
- ☐ Malla solo si el terreno no está contaminado
- ☐ Malla siempre

¿Quién realiza habitualmente el tiempo del cierre de la laparotomía?

- ☐ El mismo cirujano que ha hecho toda la intervención
- ☐ El ayudante y el cirujano ayuda al cierre
- ☐ Suelen encargarse los residentes

Y en la urgencia, ¿quién cierra la laparotomía?

- ☐ El mismo cirujano que ha hecho toda la intervención
- ☐ El ayudante y el cirujano ayuda al cierre
- ☐ Suelen encargarse los residentes

¿Cuál crees que es el porcentaje de aparición de una eventración tras una laparotomía media en tu Unidad/Sección?

- ☐ 5-10 %
- ☐ 10-20 %
- ☐ > 20 %
- ☐ No lo sé

## Comunidad Autónoma

- ☐ Andalucía
  - ☐ Aragón
  - ☐ Principado de Asturias
  - ☐ Illes Balears
  - ☐ Canarias
  - ☐ Cantabria
  - ☐ Castilla-La Mancha
  - ☐ Castilla y León
  - ☐ Cataluña
  - ☐ Comunidad Valenciana
  - ☐ Extremadura
  - ☐ Galicia
  - ☐ Comunidad de Madrid
  - ☐ La Rioja
  - ☐ Región de Murcia
  - ☐ Comunidad Foral de Navarra
  - ☐ País Vasco o Euskadi
  - ☐ Ciudades Autónomas (Ceuta o Melilla)
-
